# Supplementary material for: Is IIIG9 a New Protein with Exclusive Ciliary Function? Analysis of Its Potential Role in Cancer and Other Pathologies
Source: MDPI journal article supplement (doi:10.3390/cells11203327), 2022-10-21
Supplement: s1 [file s1]

**Table S1.** Related Pathways or Biological Functions with IIIIG9 interactors.

| IIIIG9 Interactors | Related Pathways or Biological Functions.                                                                                       | Reference |
|--------------------|---------------------------------------------------------------------------------------------------------------------------------|-----------|
| CYSRT1             | Identical protein binding                                                                                                       | [30]      |
| KRT31              | Keratinization and Development Biology.                                                                                         | [43-45]   |
| BAG4               | TWEAK pathway and death receptor signaling.                                                                                     | [43-45]   |
| TEKT4              | Sperm Motility                                                                                                                  | [43-45]   |
| HSF2BP             | Meiosis. Spermatogenesis and fertility.                                                                                         | [43-45]   |
| TRAF1              | TWEAK pathway and apoptotic pathway triggered by HIV1.                                                                          | [43-45]   |
| FKBP6              | Cell Cycle, Mitotic and Meiosis.                                                                                                | [43-45]   |
| GOLGA2             | Neurodegenerative diseases and PLK1 signaling events.                                                                           | [43-45]   |
| TRAF2              | IL-4 signaling pathways and TWEAK pathway.                                                                                      | [43-45]   |
| KRTAP6-2           | Keratinization and development Biology.                                                                                         | [43-45]   |
| FHL3               | Actin Binding. Transcriptional coactivator of FOXK1.                                                                            | [43-45]   |
| KRTAP6-3           | Keratinization and development Biology.                                                                                         | [43-45]   |
| ATPAF2             | -                                                                                                                               | [43-45]   |
| RFX6               | Regulation of beta-cell development and development biology.                                                                    | [43-45]   |
| HOXA1              | Activated PKN1 stimulates transcription of AR (androgen receptor) regulated genes KLK2 and KLK3. Mesodermal Commitment Pathway. | [43-45]   |
| HGS                | Tyrosine kinases adaptors and Budding and maturation of HIV maturation.                                                         | [43-45]   |
| COG6               | Vesicle- mediated transport and Transport to the Golgi and subsequent modification.                                             | [43-45]   |
| VMAC               | -                                                                                                                               | [43-45]   |
| HOMER3             | Protein-Protein Interactions at synapses and Transmission across Chemical Synapses.                                             | [43-45]   |
| PLEKHG4            | Possible role in intracellular signaling and cytoskeleton dynamics at the golgi.                                                | [43-45]   |
| ATN1               | Transcriptional corepressor. Protein domain specific binding and toxin activity.                                                | [43-45]   |
| LMO2               | Embryonic and Induced Pluripotent Stem Cells and Lineage- specific Markers. Hematopoietic Stem Cell Differentiation.            | [43-45]   |
| WVOX               | Signaling by ERBB4 and gene expression.                                                                                         | [43-45]   |
| KRTAP3-1           | Keratinization and development Biology                                                                                          | [43-45]   |
| PRKAA2             | Metabolism and RET signaling.                                                                                                   | [43-45]   |
| FAM168B            | Inhibitor of neuronal axonal outgrowth.                                                                                         | [43-45]   |
| KRTAP13-2          | Keratinization and development Biology                                                                                          | [43-45]   |
| RIMBP3C            | Sperm development.                                                                                                              | [43-45]   |
| PFDN5              | Chaperonin-mediated protein folding and Metabolism of proteins.                                                                 | [43-45]   |
| DTX2               | Constitutive Signaling by NOTCH and Signaling GPCR.                                                                             | [43-45]   |
| TFG                | Vesicle- mediated transport and Transport to the Golgi and subsequent modification.                                             | [43-45]   |
| AKAP8L             | RNA binding and DEAD/H-box RNA helicase binding.                                                                                | [46]      |
| LMO4               | Embryonic and Induced Pluripotent Stem Cells and Lineage- specific Markers and Neuroscience.                                    | [43-45]   |
| KRTAP19-5          | Keratinization                                                                                                                  | [43-45]   |
| LASP1              | Cytoskeletal signaling and Aquaporin-mediated transport.                                                                        | [43-45]   |
| CCDC57             | Centriole duplication, mitosis and ciliogenesis.                                                                                | [43-45]   |
| FRS3               | NGF Pathway and Cytokine Signaling in Immune system.                                                                            | [43-45]   |
| CSTF2              | Processing of Capped Intrinsless Pre-RNA and tRNA processing.                                                                   | [43-45]   |
| PRDM14             | Mesodermal Commitment Pathway and Transcriptional regulation of pluripotent stem cells.                                         | [43-45]   |
| KPRP               | Keratinization differentiation.                                                                                                 | [43-45]   |
| COX5B              | Metabolism and TP53 regulates metabolic genes.                                                                                  | [43-45]   |
| TSC1               | mTOR signaling pathway and RET signaling.                                                                                       | [43-45]   |
| C10orf55           | -                                                                                                                               | -         |
| OIP5               | Cromosome maintenance and Cell Cycle, Mitotic.                                                                                  | [43-45]   |
| INCA1              | Cyclin binding.                                                                                                                 | [43-45]   |
| UNKL               | Class 1 MHC mediated antigen processing and presentation and Innate Immune system.                                              | [43-45]   |
| PLA2G10            | Metabolism and Acyl chain remodeling of PE.                                                                                     | [43-45]   |
| KCTD9              | Activation of cAMP-dependent PKA and Hepatic ABC transporters.                                                                  | [43-45]   |
| FHL2               | Metabolism and Signaling events mediated by HDAC Class III.                                                                     | [43-45]   |
| BCAS2              | mRNA splicing-Major Pathway and Gene expression.                                                                                | [43-45]   |
| CTDSP1             | mir-124 predicted interactions with cell cycle and differentiation and Coregulation of Androgen receptor activity.              | [43-45]   |
| METTL27            | Methyltransferase activity.                                                                                                     | [47]      |

|           |                                                                                      |         |
|-----------|--------------------------------------------------------------------------------------|---------|
| KRTAP3-2  | Keratinization.                                                                      | [43-45] |
| KRTAP8-1  | Keratinization.                                                                      | [43-45] |
| KRTAP19-6 | Keratinization.                                                                      | [43-45] |
| HNRNP1    | MECP2 and associated Rett Syndrome and Signaling by FGFR2.                           | [43-45] |
| QARS      | Metabolism and Peptide chain elongation.                                             | [43-45] |
| OTUD7B    | TWEAK pathway and Ovarian tumor domain proteases.                                    | [43-45] |
| PLEKHN1   | Cardiopilin binding.                                                                 | [48]    |
| ALS2CL    | Vesicle- mediated transport and RAB GEFs exchange GTP for GDP on RABs.               | [43-45] |
| TGM7      | Protein-glutamine gamma-glutamyltransferase activity.                                | [43-45] |
| CATSPER1  | Fertilization and Sweet Taste signaling.                                             | [43-45] |
| SLAIN1    | Cytoplasmic microtubule organization.                                                | [47]    |
| B9D2      | Mitotic Prometaphase and Mitotic Metaphase and Anaphase. Gamma tubulin binding.      | [43-45] |
| PPP1CC    | Metabolism and Beta-Adrenergic Signaling. RNA binding and hydrolase activity.        | [43-45] |
| ZMYND12   | Metal ion binding activity.                                                          | [43-45] |
| RBM11     | poly (U) RNA binding and cell differentiation.                                       | [43-45] |
| TRIB3     | Metabolism and RET signaling.                                                        | [43-45] |
| MYO15B    | ATP binding activity, actin binding activity and cytoskeletal motor activity.        | [43-45] |
| FHL5      | Transcription CREM signaling in testis.                                              | [43-45] |
| APP       | Peptide ligand- binding receptors. Neurodegenerative Diseases.                       | [43-45] |
| DVL2      | Wnt mediated activation of DVL. DNA damage response.                                 | [43-45] |
| IDE       | A- beta plaque formation and APP metabolism. Metabolism of proteins.                 | [43-45] |
| PPP1CA    | Metabolism and beta- adrenergic signaling.                                           | [43-45] |
| RNF123    | Class 1 MHC mediated antigen processing and presentation and Innate Immune system.   | [43-45] |
| RPL21     | Peptide chain elongation and metabolism.                                             | [43-45] |
| UBR1      | Class 1 MHC mediated antigen processing and presentation and protein ubiquitylation. | [43-45] |

## References

30. Luck, K.; Kim, D.K.; Lambourne, L.; Spirohn, K.; Begg, B.E.; Bian, W.; Brignall, R.; Cafarelli, T.; Campos-Laborie, F.J.; Charlotiaux, B.; et al. A reference map of the human binary protein interactome. *Nature* **2020**, *580*, 402-408, doi:10.1038/s41586-020-2188-x.
43. Belinky, F.; Nativ, N.; Stelzer, G.; Zimmerman, S.; Iny Stein, T.; Safran, M.; Lancet, D. PathCards: multi-source consolidation of human biological pathways. *Database (Oxford)* **2015**, *2015*, 1-13, doi:10.1093/database/bav006.
44. Safran, M.; Rosen, N.; Twik, M.; BarShir, R.; Stein, T.I.; Dahary, D.; Fishilevich, S.; Lancet, D. The GeneCards Suite. In *Practical Guide to Life Science Databases*, Abugessaisa, I., Kasukawa, T., Eds.; Springer Singapore: Singapore, 2021; pp. 27-56.
45. PathCards, Pathway Unification Database. Available online: <https://pathcards.genecards.org/> (accessed on 10/6/2022).
46. Westberg, C.; Yang, J.P.; Tang, H.; Reddy, T.R.; Wong-Staal, F. A novel shuttle protein binds to RNA helicase A and activates the retroviral constitutive transport element. *J Biol Chem* **2000**, *275*, 21396-21401, doi:10.1074/jbc.M909887199.
47. Gaudet, P.; Livstone, M.S.; Lewis, S.E.; Thomas, P.D. Phylogenetic-based propagation of functional annotations within the Gene Ontology consortium. *Brief Bioinform* **2011**, *12*, 449-462, doi:10.1093/bib/bbr042.
48. Sano, E.; Shono, S.; Tashiro, K.; Konishi, H.; Yamauchi, E.; Taniguchi, H. Novel tyrosine phosphorylated and cardiolipin-binding protein CLPABP functions as mitochondrial RNA granule. *Biochim Biophys Acta* **2008**, *1783*, 1036-1047, doi:10.1016/j.bbamcr.2007.12.009.
